# Supplementary material
Source: publisher figshare collection journal article supplement (https://acs.figshare.com/ndownloader/files/4144348)
Supplement: Supplementary file 1 [file 4144348]

 
data_6-hydroxymexicanolide 
 
_audit_creation_method            SHELXL-97 
_chemical_name_systematic 
; 
 ? 
; 
_chemical_name_common             ? 
_chemical_melting_point           ? 
_chemical_formula_moiety          ? 
_chemical_formula_sum 
 'C27 H32 O8' 
_chemical_formula_weight          484.53 
 
loop_ 
 _atom_type_symbol 
 _atom_type_description 
 _atom_type_scat_dispersion_real 
 _atom_type_scat_dispersion_imag 
 _atom_type_scat_source 
 'C'  'C'   0.0181   0.0091 
 'International Tables Vol C Tables 4.2.6.8 and 6.1.1.4' 
 'H'  'H'   0.0000   0.0000 
 'International Tables Vol C Tables 4.2.6.8 and 6.1.1.4' 
 'O'  'O'   0.0492   0.0322 
 'International Tables Vol C Tables 4.2.6.8 and 6.1.1.4' 
 
_symmetry_cell_setting            Orthorhombic
_symmetry_space_group_name_H-M    P2(1)2(1)2(1) 
 
loop_ 
 _symmetry_equiv_pos_as_xyz 
 'x, y, z' 
 '-x+1/2, -y, z+1/2' 
 '-x, y+1/2, -z+1/2' 
 'x+1/2, -y+1/2, -z' 
 
_cell_length_a                    10.6167(2) 
_cell_length_b                    10.7288(2) 
_cell_length_c                    21.4811(4) 
_cell_angle_alpha                 90.00 
_cell_angle_beta                  90.00 
_cell_angle_gamma                 90.00 
_cell_volume                      2446.79(8) 
_cell_formula_units_Z             4 
_cell_measurement_temperature     296(2) 
_cell_measurement_reflns_used     3239 
_cell_measurement_theta_min       4.1 
_cell_measurement_theta_max       62.5 
 
_exptl_crystal_description        block 
_exptl_crystal_colour             colorless 
_exptl_crystal_size_max           0.43 
_exptl_crystal_size_mid           0.32 
_exptl_crystal_size_min           0.26 
_exptl_crystal_density_meas       ? 
_exptl_crystal_density_diffrn     1.315 
_exptl_crystal_density_method     'not measured' 
_exptl_crystal_F_000              1032 
_exptl_absorpt_coefficient_mu     0.798 
_exptl_absorpt_correction_type    'multi-scan' 
_exptl_absorpt_correction_T_min   0.724 
_exptl_absorpt_correction_T_max   1.000 
_exptl_absorpt_process_details    ? 
 
_exptl_special_details 
; 
 ? 
; 
 
_diffrn_ambient_temperature       296(2) 
_diffrn_radiation_wavelength      1.54184 
_diffrn_radiation_type            CuK\a 
_diffrn_radiation_source          'fine-focus sealed tube' 
_diffrn_radiation_monochromator   graphite 
_diffrn_measurement_device_type   'Oxford Gemini S ultra' 
_diffrn_measurement_method        'omega scan' 
_diffrn_detector_area_resol_mean  ? 
_diffrn_standards_number          ? 
_diffrn_standards_interval_count  ? 
_diffrn_standards_interval_time   ? 
_diffrn_standards_decay_%         ? 
_diffrn_reflns_number             5165 
_diffrn_reflns_av_R_equivalents   0.0141 
_diffrn_reflns_av_sigmaI/netI     0.0230 
_diffrn_reflns_limit_h_min        -12 
_diffrn_reflns_limit_h_max        10 
_diffrn_reflns_limit_k_min        -10 
_diffrn_reflns_limit_k_max        12 
_diffrn_reflns_limit_l_min        -21 
_diffrn_reflns_limit_l_max        24 
_diffrn_reflns_theta_min          4.12 
_diffrn_reflns_theta_max          62.58 
_reflns_number_total              3447 
_reflns_number_gt                 3273 
_reflns_threshold_expression      >2sigma(I) 
 
_computing_data_collection        ? 
_computing_cell_refinement        ? 
_computing_data_reduction         ? 
_computing_structure_solution     'SHELXS-97 (Sheldrick, 1990)' 
_computing_structure_refinement   'SHELXL-97 (Sheldrick, 1997)' 
_computing_molecular_graphics     ? 
_computing_publication_material   ? 
 
_refine_special_details 
; 
 Refinement of F^2^ against ALL reflections.  The weighted R-factor wR and 
 goodness of fit S are based on F^2^, conventional R-factors R are based 
 on F, with F set to zero for negative F^2^. The threshold expression of 
 F^2^ > 2sigma(F^2^) is used only for calculating R-factors(gt) etc. and is 
 not relevant to the choice of reflections for refinement.  R-factors based 
 on F^2^ are statistically about twice as large as those based on F, and R- 
 factors based on ALL data will be even larger. 
; 
 
_refine_ls_structure_factor_coef  Fsqd  
_refine_ls_matrix_type            full 
_refine_ls_weighting_scheme       calc  
_refine_ls_weighting_details 
 'calc w=1/[\s^2^(Fo^2^)+(0.0582P)^2^+0.4805P] where P=(Fo^2^+2Fc^2^)/3' 
_atom_sites_solution_primary      direct 
_atom_sites_solution_secondary    difmap 
_atom_sites_solution_hydrogens    geom 
_refine_ls_hydrogen_treatment     mixed 
_refine_ls_extinction_method      none 
_refine_ls_extinction_coef        ? 
_refine_ls_abs_structure_details 
 'Flack H D (1983), Acta Cryst. A39, 876-881' 
_refine_ls_abs_structure_Flack    0.0(2) 
_refine_ls_number_reflns          3447 
_refine_ls_number_parameters      317 
_refine_ls_number_restraints      0 
_refine_ls_R_factor_all           0.0427 
_refine_ls_R_factor_gt            0.0405 
_refine_ls_wR_factor_ref          0.1070 
_refine_ls_wR_factor_gt           0.1045 
_refine_ls_goodness_of_fit_ref    1.068 
_refine_ls_restrained_S_all       1.068 
_refine_ls_shift/su_max           0.041 
_refine_ls_shift/su_mean          0.000 
 
loop_ 
 _atom_site_label 
 _atom_site_type_symbol 
 _atom_site_fract_x 
 _atom_site_fract_y 
 _atom_site_fract_z 
 _atom_site_U_iso_or_equiv 
 _atom_site_adp_type 
 _atom_site_occupancy 
 _atom_site_symmetry_multiplicity 
 _atom_site_calc_flag 
 _atom_site_refinement_flags 
 _atom_site_disorder_assembly 
 _atom_site_disorder_group 
C1 C 0.7372(3) 0.0881(2) 0.51502(11) 0.0534(6) Uani 1 1 d . . . 
C2 C 0.7046(3) -0.0464(2) 0.51574(11) 0.0555(6) Uani 1 1 d . . . 
H2A H 0.7181 -0.0795 0.5577 0.067 Uiso 1 1 calc R . . 
C3 C 0.7852(3) -0.1197(2) 0.46959(11) 0.0569(7) Uani 1 1 d . . . 
C4 C 0.8784(3) -0.0456(2) 0.43036(12) 0.0561(6) Uani 1 1 d . . . 
C5 C 0.7982(2) 0.0621(2) 0.40086(10) 0.0443(5) Uani 1 1 d . . . 
H5A H 0.7295 0.0194 0.3791 0.053 Uiso 1 1 calc R . . 
C6 C 0.8642(2) 0.1388(3) 0.35011(13) 0.0616(7) Uani 1 1 d . . . 
H6A H 0.8063 0.2061 0.3385 0.074 Uiso 1 1 calc R . . 
C7 C 0.8980(3) 0.0726(4) 0.29165(16) 0.0786(9) Uani 1 1 d . . . 
C8 C 0.5307(2) 0.0170(2) 0.44090(10) 0.0446(5) Uani 1 1 d . . . 
C9 C 0.5822(2) 0.1479(2) 0.43965(10) 0.0439(5) Uani 1 1 d . . . 
H9A H 0.5466 0.1892 0.4763 0.053 Uiso 1 1 calc R . . 
C10 C 0.7301(2) 0.1472(2) 0.45047(11) 0.0459(5) Uani 1 1 d . . . 
C11 C 0.5360(2) 0.2237(2) 0.38381(11) 0.0461(5) Uani 1 1 d . . . 
H11B H 0.4581 0.2652 0.3951 0.055 Uiso 1 1 calc R . . 
H11A H 0.5977 0.2876 0.3744 0.055 Uiso 1 1 calc R . . 
C12 C 0.5134(2) 0.1466(2) 0.32565(10) 0.0408(5) Uani 1 1 d . . . 
H12B H 0.5928 0.1120 0.3115 0.049 Uiso 1 1 calc R . . 
H12A H 0.4808 0.2000 0.2930 0.049 Uiso 1 1 calc R . . 
C13 C 0.4200(2) 0.04045(19) 0.33773(9) 0.0375(5) Uani 1 1 d . . . 
C14 C 0.4564(2) -0.0295(2) 0.39621(10) 0.0406(5) Uani 1 1 d . . . 
C15 C 0.3989(3) -0.1590(2) 0.40106(12) 0.0567(6) Uani 1 1 d . . . 
H15A H 0.4668 -0.2178 0.4082 0.068 Uiso 1 1 calc R . . 
H15B H 0.3454 -0.1606 0.4377 0.068 Uiso 1 1 calc R . . 
C16 C 0.3233(2) -0.2054(2) 0.34743(11) 0.0505(6) Uani 1 1 d . . . 
C17 C 0.4308(2) -0.0535(2) 0.28388(10) 0.0405(5) Uani 1 1 d . . . 
H17A H 0.5163 -0.0879 0.2838 0.049 Uiso 1 1 calc R . . 
C18 C 0.2853(2) 0.0900(2) 0.34433(12) 0.0493(6) Uani 1 1 d . . . 
H18A H 0.2289 0.0218 0.3521 0.074 Uiso 1 1 calc R . . 
H18B H 0.2611 0.1317 0.3066 0.074 Uiso 1 1 calc R . . 
H18C H 0.2816 0.1477 0.3785 0.074 Uiso 1 1 calc R . . 
C19 C 0.7784(3) 0.2818(2) 0.45550(14) 0.0640(7) Uani 1 1 d . . . 
H19A H 0.7309 0.3255 0.4866 0.096 Uiso 1 1 calc R . . 
H19B H 0.7687 0.3228 0.4161 0.096 Uiso 1 1 calc R . . 
H19C H 0.8658 0.2811 0.4670 0.096 Uiso 1 1 calc R . . 
C20 C 0.4038(2) -0.0014(2) 0.22060(10) 0.0464(5) Uani 1 1 d . . . 
C21 C 0.4897(3) 0.0310(3) 0.17823(12) 0.0678(8) Uani 1 1 d . . . 
H21A H 0.5763 0.0235 0.1836 0.081 Uiso 1 1 calc R . . 
C22 C 0.2847(3) 0.0228(3) 0.19321(12) 0.0666(7) Uani 1 1 d . . . 
H22A H 0.2061 0.0085 0.2110 0.080 Uiso 1 1 calc R . . 
C23 C 0.3078(4) 0.0703(3) 0.13660(14) 0.0811(10) Uani 1 1 d . . . 
H23A H 0.2461 0.0955 0.1085 0.097 Uiso 1 1 calc R . . 
C28 C 0.9352(3) -0.1325(3) 0.38173(15) 0.0761(9) Uani 1 1 d . . . 
H28A H 0.9828 -0.1966 0.4022 0.114 Uiso 1 1 calc R . . 
H28B H 0.9897 -0.0858 0.3547 0.114 Uiso 1 1 calc R . . 
H28C H 0.8690 -0.1697 0.3577 0.114 Uiso 1 1 calc R . . 
C29 C 0.9856(3) -0.0009(3) 0.47409(16) 0.0774(9) Uani 1 1 d . . . 
H29A H 1.0299 -0.0718 0.4903 0.116 Uiso 1 1 calc R . . 
H29B H 0.9502 0.0461 0.5079 0.116 Uiso 1 1 calc R . . 
H29C H 1.0430 0.0508 0.4512 0.116 Uiso 1 1 calc R . . 
C30 C 0.5629(3) -0.0559(3) 0.49925(11) 0.0608(7) Uani 1 1 d . . . 
H30A H 0.5408 -0.1427 0.4931 0.073 Uiso 1 1 calc R . . 
H30B H 0.5133 -0.0243 0.5337 0.073 Uiso 1 1 calc R . . 
C31 C 0.8337(5) -0.0616(4) 0.21129(17) 0.1184(16) Uani 1 1 d . . . 
H31A H 0.7618 -0.1085 0.1978 0.178 Uiso 1 1 calc R . . 
H31B H 0.9030 -0.1172 0.2186 0.178 Uiso 1 1 calc R . . 
H31C H 0.8565 -0.0024 0.1797 0.178 Uiso 1 1 calc R . . 
O1 O 0.7539(2) 0.14771(19) 0.56238(8) 0.0765(6) Uani 1 1 d . . . 
O2 O 0.7733(3) -0.23072(17) 0.46665(9) 0.0802(7) Uani 1 1 d . . . 
O3 O 0.97576(19) 0.1965(3) 0.37295(13) 0.0978(8) Uani 1 1 d . . . 
H3A H 1.0087 0.2370 0.3450 0.147 Uiso 1 1 calc R . . 
O4 O 0.9986(3) 0.0818(4) 0.26639(13) 0.1247(12) Uani 1 1 d . . . 
O5 O 0.8033(2) 0.0043(2) 0.26871(9) 0.0799(7) Uani 1 1 d . . . 
O6 O 0.2481(2) -0.28826(18) 0.35204(9) 0.0734(6) Uani 1 1 d . . . 
O7 O 0.34193(16) -0.15596(15) 0.29077(7) 0.0504(4) Uani 1 1 d . . . 
O8 O 0.4333(3) 0.0766(2) 0.12596(9) 0.0871(7) Uani 1 1 d . . . 
 
loop_ 
 _atom_site_aniso_label 
 _atom_site_aniso_U_11 
 _atom_site_aniso_U_22 
 _atom_site_aniso_U_33 
 _atom_site_aniso_U_23 
 _atom_site_aniso_U_13 
 _atom_site_aniso_U_12 
C1 0.0647(15) 0.0554(14) 0.0401(12) -0.0058(11) -0.0097(12) -0.0014(13) 
C2 0.0790(17) 0.0566(14) 0.0308(10) 0.0053(11) -0.0141(12) -0.0093(14) 
C3 0.0871(19) 0.0473(14) 0.0364(12) 0.0025(11) -0.0258(13) 0.0013(14) 
C4 0.0648(15) 0.0534(14) 0.0500(13) 0.0022(12) -0.0155(12) 0.0097(13) 
C5 0.0435(11) 0.0477(12) 0.0416(11) 0.0029(11) -0.0064(10) 0.0014(11) 
C6 0.0474(13) 0.0707(17) 0.0665(16) 0.0212(15) 0.0071(13) 0.0050(13) 
C7 0.072(2) 0.097(2) 0.0663(19) 0.0184(18) 0.0096(18) 0.0242(19) 
C8 0.0507(13) 0.0473(12) 0.0357(11) 0.0037(10) 0.0047(10) -0.0044(11) 
C9 0.0515(12) 0.0427(12) 0.0374(11) -0.0052(10) 0.0023(10) -0.0006(11) 
C10 0.0561(13) 0.0393(11) 0.0423(12) -0.0017(10) -0.0099(11) -0.0038(11) 
C11 0.0486(12) 0.0346(11) 0.0550(13) -0.0004(10) -0.0032(11) -0.0007(10) 
C12 0.0441(12) 0.0361(11) 0.0423(11) 0.0066(9) -0.0033(10) -0.0019(10) 
C13 0.0382(10) 0.0366(10) 0.0378(10) 0.0005(9) 0.0045(9) 0.0025(9) 
C14 0.0445(11) 0.0384(11) 0.0390(11) 0.0024(10) 0.0062(10) -0.0021(10) 
C15 0.0714(16) 0.0489(13) 0.0497(13) 0.0102(12) -0.0020(13) -0.0157(13) 
C16 0.0613(14) 0.0388(12) 0.0513(13) 0.0027(11) 0.0038(12) -0.0065(12) 
C17 0.0461(11) 0.0365(11) 0.0389(11) 0.0005(10) 0.0048(10) -0.0002(10) 
C18 0.0442(12) 0.0508(13) 0.0529(13) -0.0091(11) 0.0018(11) 0.0041(11) 
C19 0.0690(17) 0.0491(14) 0.0739(17) -0.0009(14) -0.0228(15) -0.0119(14) 
C20 0.0605(14) 0.0416(12) 0.0371(11) -0.0013(10) 0.0030(11) -0.0032(11) 
C21 0.083(2) 0.0752(19) 0.0452(14) 0.0093(14) 0.0044(14) -0.0130(17) 
C22 0.0747(18) 0.0742(18) 0.0509(15) 0.0000(14) -0.0090(13) 0.0029(16) 
C23 0.119(3) 0.0707(19) 0.0532(16) 0.0074(15) -0.0255(19) 0.007(2) 
C28 0.089(2) 0.0722(19) 0.0672(18) 0.0045(15) -0.0063(17) 0.0355(17) 
C29 0.0683(18) 0.084(2) 0.080(2) 0.0079(17) -0.0317(16) 0.0093(17) 
C30 0.0795(18) 0.0642(16) 0.0386(13) 0.0132(12) -0.0031(12) -0.0150(15) 
C31 0.160(4) 0.127(3) 0.068(2) -0.026(2) 0.001(3) 0.058(3) 
O1 0.1102(17) 0.0751(12) 0.0442(10) -0.0179(9) -0.0205(11) -0.0099(13) 
O2 0.137(2) 0.0477(10) 0.0562(11) 0.0005(9) -0.0150(12) -0.0054(12) 
O3 0.0578(12) 0.1104(19) 0.1252(19) 0.0357(16) -0.0045(13) -0.0247(13) 
O4 0.0866(16) 0.185(3) 0.103(2) 0.039(2) 0.0515(16) 0.0436(19) 
O5 0.0984(16) 0.0961(16) 0.0451(10) 0.0000(10) 0.0085(10) 0.0458(14) 
O6 0.0872(13) 0.0609(11) 0.0721(12) 0.0081(10) -0.0019(11) -0.0359(11) 
O7 0.0648(10) 0.0404(8) 0.0459(9) -0.0027(7) 0.0016(8) -0.0120(8) 
O8 0.126(2) 0.0896(16) 0.0460(10) 0.0178(11) 0.0031(12) -0.0191(16) 
 
_geom_special_details 
; 
 All esds (except the esd in the dihedral angle between two l.s. planes) 
 are estimated using the full covariance matrix.  The cell esds are taken 
 into account individually in the estimation of esds in distances, angles 
 and torsion angles; correlations between esds in cell parameters are only 
 used when they are defined by crystal symmetry.  An approximate (isotropic) 
 treatment of cell esds is used for estimating esds involving l.s. planes. 
; 
 
loop_ 
 _geom_bond_atom_site_label_1 
 _geom_bond_atom_site_label_2 
 _geom_bond_distance 
 _geom_bond_site_symmetry_2 
 _geom_bond_publ_flag 
C1 O1 1.215(3) . ? 
C1 C2 1.484(4) . ? 
C1 C10 1.526(3) . ? 
C2 C3 1.527(4) . ? 
C2 C30 1.549(4) . ? 
C3 O2 1.200(3) . ? 
C3 C4 1.523(4) . ? 
C4 C28 1.524(4) . ? 
C4 C29 1.552(4) . ? 
C4 C5 1.569(3) . ? 
C5 C6 1.535(3) . ? 
C5 C10 1.578(3) . ? 
C6 O3 1.424(4) . ? 
C6 C7 1.487(4) . ? 
C7 O4 1.202(4) . ? 
C7 O5 1.339(4) . ? 
C8 C14 1.338(3) . ? 
C8 C9 1.508(3) . ? 
C8 C30 1.516(3) . ? 
C9 C11 1.530(3) . ? 
C9 C10 1.587(3) . ? 
C10 C19 1.536(3) . ? 
C11 C12 1.517(3) . ? 
C12 C13 1.533(3) . ? 
C13 C14 1.514(3) . ? 
C13 C18 1.532(3) . ? 
C13 C17 1.539(3) . ? 
C14 C15 1.522(3) . ? 
C15 C16 1.489(3) . ? 
C16 O6 1.199(3) . ? 
C16 O7 1.342(3) . ? 
C17 O7 1.456(3) . ? 
C17 C20 1.498(3) . ? 
C20 C21 1.335(4) . ? 
C20 C22 1.418(4) . ? 
C21 O8 1.364(4) . ? 
C22 C23 1.341(4) . ? 
C23 O8 1.354(5) . ? 
C31 O5 1.458(4) . ? 
 
loop_ 
 _geom_angle_atom_site_label_1 
 _geom_angle_atom_site_label_2 
 _geom_angle_atom_site_label_3 
 _geom_angle 
 _geom_angle_site_symmetry_1 
 _geom_angle_site_symmetry_3 
 _geom_angle_publ_flag 
O1 C1 C2 122.5(2) . . ? 
O1 C1 C10 123.3(2) . . ? 
C2 C1 C10 113.7(2) . . ? 
C1 C2 C3 111.3(2) . . ? 
C1 C2 C30 106.7(2) . . ? 
C3 C2 C30 111.2(2) . . ? 
O2 C3 C4 123.8(3) . . ? 
O2 C3 C2 119.1(3) . . ? 
C4 C3 C2 117.0(2) . . ? 
C3 C4 C28 108.5(2) . . ? 
C3 C4 C29 107.6(2) . . ? 
C28 C4 C29 108.3(2) . . ? 
C3 C4 C5 104.8(2) . . ? 
C28 C4 C5 112.9(2) . . ? 
C29 C4 C5 114.5(2) . . ? 
C6 C5 C4 115.7(2) . . ? 
C6 C5 C10 112.26(19) . . ? 
C4 C5 C10 113.69(19) . . ? 
O3 C6 C7 107.3(2) . . ? 
O3 C6 C5 111.6(2) . . ? 
C7 C6 C5 117.0(3) . . ? 
O4 C7 O5 123.1(4) . . ? 
O4 C7 C6 123.8(4) . . ? 
O5 C7 C6 113.0(3) . . ? 
C14 C8 C9 123.2(2) . . ? 
C14 C8 C30 122.3(2) . . ? 
C9 C8 C30 114.4(2) . . ? 
C8 C9 C11 113.11(19) . . ? 
C8 C9 C10 110.57(19) . . ? 
C11 C9 C10 115.79(19) . . ? 
C1 C10 C19 108.0(2) . . ? 
C1 C10 C5 110.53(18) . . ? 
C19 C10 C5 116.0(2) . . ? 
C1 C10 C9 100.62(19) . . ? 
C19 C10 C9 109.6(2) . . ? 
C5 C10 C9 110.95(17) . . ? 
C12 C11 C9 114.00(18) . . ? 
C11 C12 C13 111.59(18) . . ? 
C14 C13 C18 109.52(19) . . ? 
C14 C13 C12 110.06(18) . . ? 
C18 C13 C12 111.20(18) . . ? 
C14 C13 C17 106.26(17) . . ? 
C18 C13 C17 111.54(18) . . ? 
C12 C13 C17 108.13(17) . . ? 
C8 C14 C13 124.2(2) . . ? 
C8 C14 C15 121.8(2) . . ? 
C13 C14 C15 114.00(19) . . ? 
C16 C15 C14 117.9(2) . . ? 
O6 C16 O7 117.8(2) . . ? 
O6 C16 C15 122.8(2) . . ? 
O7 C16 C15 119.4(2) . . ? 
O7 C17 C20 104.48(18) . . ? 
O7 C17 C13 111.69(17) . . ? 
C20 C17 C13 115.03(18) . . ? 
C21 C20 C22 106.2(2) . . ? 
C21 C20 C17 125.8(2) . . ? 
C22 C20 C17 128.0(2) . . ? 
C20 C21 O8 110.7(3) . . ? 
C23 C22 C20 106.4(3) . . ? 
C22 C23 O8 110.6(3) . . ? 
C8 C30 C2 112.0(2) . . ? 
C7 O5 C31 114.2(3) . . ? 
C16 O7 C17 119.05(17) . . ? 
C23 O8 C21 106.0(2) . . ? 
 
loop_ 
 _geom_torsion_atom_site_label_1 
 _geom_torsion_atom_site_label_2 
 _geom_torsion_atom_site_label_3 
 _geom_torsion_atom_site_label_4 
 _geom_torsion 
 _geom_torsion_site_symmetry_1 
 _geom_torsion_site_symmetry_2 
 _geom_torsion_site_symmetry_3 
 _geom_torsion_site_symmetry_4 
 _geom_torsion_publ_flag 
O1 C1 C2 C3 -133.2(3) . . . . ? 
C10 C1 C2 C3 54.6(3) . . . . ? 
O1 C1 C2 C30 105.3(3) . . . . ? 
C10 C1 C2 C30 -66.9(3) . . . . ? 
C1 C2 C3 O2 177.0(2) . . . . ? 
C30 C2 C3 O2 -64.1(3) . . . . ? 
C1 C2 C3 C4 -2.1(3) . . . . ? 
C30 C2 C3 C4 116.8(2) . . . . ? 
O2 C3 C4 C28 8.8(4) . . . . ? 
C2 C3 C4 C28 -172.2(2) . . . . ? 
O2 C3 C4 C29 -108.2(3) . . . . ? 
C2 C3 C4 C29 70.8(3) . . . . ? 
O2 C3 C4 C5 129.5(3) . . . . ? 
C2 C3 C4 C5 -51.4(3) . . . . ? 
C3 C4 C5 C6 -170.1(2) . . . . ? 
C28 C4 C5 C6 -52.2(3) . . . . ? 
C29 C4 C5 C6 72.2(3) . . . . ? 
C3 C4 C5 C10 57.8(2) . . . . ? 
C28 C4 C5 C10 175.6(2) . . . . ? 
C29 C4 C5 C10 -59.9(3) . . . . ? 
C4 C5 C6 O3 -59.1(3) . . . . ? 
C10 C5 C6 O3 73.7(3) . . . . ? 
C4 C5 C6 C7 65.0(3) . . . . ? 
C10 C5 C6 C7 -162.2(2) . . . . ? 
O3 C6 C7 O4 -8.0(4) . . . . ? 
C5 C6 C7 O4 -134.3(3) . . . . ? 
O3 C6 C7 O5 173.9(3) . . . . ? 
C5 C6 C7 O5 47.6(4) . . . . ? 
C14 C8 C9 C11 2.7(3) . . . . ? 
C30 C8 C9 C11 -173.6(2) . . . . ? 
C14 C8 C9 C10 -129.0(2) . . . . ? 
C30 C8 C9 C10 54.7(3) . . . . ? 
O1 C1 C10 C19 13.4(4) . . . . ? 
C2 C1 C10 C19 -174.5(2) . . . . ? 
O1 C1 C10 C5 141.3(3) . . . . ? 
C2 C1 C10 C5 -46.6(3) . . . . ? 
O1 C1 C10 C9 -101.4(3) . . . . ? 
C2 C1 C10 C9 70.7(3) . . . . ? 
C6 C5 C10 C1 -145.3(2) . . . . ? 
C4 C5 C10 C1 -11.5(3) . . . . ? 
C6 C5 C10 C19 -21.9(3) . . . . ? 
C4 C5 C10 C19 111.9(2) . . . . ? 
C6 C5 C10 C9 104.0(2) . . . . ? 
C4 C5 C10 C9 -122.2(2) . . . . ? 
C8 C9 C10 C1 -60.7(2) . . . . ? 
C11 C9 C10 C1 168.94(18) . . . . ? 
C8 C9 C10 C19 -174.4(2) . . . . ? 
C11 C9 C10 C19 55.3(3) . . . . ? 
C8 C9 C10 C5 56.2(2) . . . . ? 
C11 C9 C10 C5 -74.1(2) . . . . ? 
C8 C9 C11 C12 -32.3(3) . . . . ? 
C10 C9 C11 C12 96.8(2) . . . . ? 
C9 C11 C12 C13 56.5(3) . . . . ? 
C11 C12 C13 C14 -48.4(2) . . . . ? 
C11 C12 C13 C18 73.1(2) . . . . ? 
C11 C12 C13 C17 -164.07(18) . . . . ? 
C9 C8 C14 C13 3.0(4) . . . . ? 
C30 C8 C14 C13 179.0(2) . . . . ? 
C9 C8 C14 C15 -175.8(2) . . . . ? 
C30 C8 C14 C15 0.2(4) . . . . ? 
C18 C13 C14 C8 -102.3(3) . . . . ? 
C12 C13 C14 C8 20.3(3) . . . . ? 
C17 C13 C14 C8 137.1(2) . . . . ? 
C18 C13 C14 C15 76.6(2) . . . . ? 
C12 C13 C14 C15 -160.86(19) . . . . ? 
C17 C13 C14 C15 -44.0(2) . . . . ? 
C8 C14 C15 C16 -176.7(2) . . . . ? 
C13 C14 C15 C16 4.4(3) . . . . ? 
C14 C15 C16 O6 -159.7(2) . . . . ? 
C14 C15 C16 O7 22.5(4) . . . . ? 
C14 C13 C17 O7 63.6(2) . . . . ? 
C18 C13 C17 O7 -55.6(2) . . . . ? 
C12 C13 C17 O7 -178.22(17) . . . . ? 
C14 C13 C17 C20 -177.49(19) . . . . ? 
C18 C13 C17 C20 63.2(2) . . . . ? 
C12 C13 C17 C20 -59.4(2) . . . . ? 
O7 C17 C20 C21 -135.7(3) . . . . ? 
C13 C17 C20 C21 101.5(3) . . . . ? 
O7 C17 C20 C22 43.7(3) . . . . ? 
C13 C17 C20 C22 -79.1(3) . . . . ? 
C22 C20 C21 O8 1.2(3) . . . . ? 
C17 C20 C21 O8 -179.3(2) . . . . ? 
C21 C20 C22 C23 -1.2(3) . . . . ? 
C17 C20 C22 C23 179.3(2) . . . . ? 
C20 C22 C23 O8 0.7(4) . . . . ? 
C14 C8 C30 C2 135.6(2) . . . . ? 
C9 C8 C30 C2 -48.1(3) . . . . ? 
C1 C2 C30 C8 50.5(3) . . . . ? 
C3 C2 C30 C8 -71.1(3) . . . . ? 
O4 C7 O5 C31 1.9(5) . . . . ? 
C6 C7 O5 C31 179.9(3) . . . . ? 
O6 C16 O7 C17 178.8(2) . . . . ? 
C15 C16 O7 C17 -3.3(3) . . . . ? 
C20 C17 O7 C16 -165.9(2) . . . . ? 
C13 C17 O7 C16 -41.0(3) . . . . ? 
C22 C23 O8 C21 0.0(4) . . . . ? 
C20 C21 O8 C23 -0.8(4) . . . . ? 
 
_diffrn_measured_fraction_theta_max    0.983 
_diffrn_reflns_theta_full              62.58 
_diffrn_measured_fraction_theta_full   0.983 
_refine_diff_density_max    0.232 
_refine_diff_density_min   -0.162 
_refine_diff_density_rms    0.034 
